# Supplementary material for: Risk Factors for Major Adverse Cardiovascular Events in Phase III and Long‐Term Extension Studies of Tofacitinib in Patients With Rheumatoid Arthritis
Source: PubMed Central journal article supplement — Arthritis Rheumatol. 2019 Aug 6;71(9):1450–9. doi: 10.1002/art.40911 (PMC6754249; doi:10.1002/art.40911), 2019-08-06
Supplement: NIHMS1044055-supplement-supplemental_table_1.pdf [file NIHMS1044055-supplement-supplemental_table_1.pdf]

**Supplementary Table 1.** Phase III and LTE studies included in this analysis (1)

| <b>Study name</b>       | <b>ClinicalTrials.gov identifier</b> | <b>Patients receiving tofacitinib, n</b> | <b>Patient population</b>                                            | <b>Tofacitinib dose</b>                | <b>Control group</b>                         | <b>Study duration</b> |
|-------------------------|--------------------------------------|------------------------------------------|----------------------------------------------------------------------|----------------------------------------|----------------------------------------------|-----------------------|
| <b>Phase III</b>        |                                      |                                          |                                                                      |                                        |                                              |                       |
| ORAL Step, A3921032 (2) | NCT00960440                          | 267                                      | Patients with moderate to severe RA with inadequate response to TNFi | 5 or 10 mg BID with background MTX     | Placebo                                      | 6 months              |
| ORAL Solo, A3921045 (3) | NCT00814307                          | 610                                      | Patients with active RA with inadequate response to $\geq 1$ DMARD   | 5 or 10 mg BID monotherapy             | Placebo (advanced to tofacitinib at month 3) | 6 months              |
| ORAL Sync, A3921046 (4) | NCT00856544                          | 792                                      | Patients with active RA with inadequate                              | 5 or 10 mg BID with background csDMARD | Placebo (non-responders advanced to          | 12 months             |

|                             |             |     |                                                                  |                                          |                                                                                                                                                 |           |
|-----------------------------|-------------|-----|------------------------------------------------------------------|------------------------------------------|-------------------------------------------------------------------------------------------------------------------------------------------------|-----------|
|                             |             |     | response to<br>≥1 DMARD                                          |                                          | tofacitinib at<br>month 3; all<br>remaining placebo<br>patients advanced to<br>placebo at month 6)                                              |           |
| ORAL Start,<br>A3921069 (5) | NCT01039688 | 770 | MTX-naïve patients<br>with active RA                             | 5 or 10 mg BID<br>monotherapy            | MTX                                                                                                                                             | 24 months |
| ORAL Scan,<br>A3921044 (6)  | NCT00847613 | 797 | Patients with active<br>RA with<br>inadequate response<br>to MTX | 5 or 10 mg BID<br>with background<br>MTX | Placebo<br>(non-responders<br>advanced to<br>tofacitinib at<br>month 3; all<br>remaining placebo<br>patients advanced to<br>placebo at month 6) | 24 months |

|                                   |             |                                    |                                                                                           |                                                       |                                                                                                                                                                             |           |
|-----------------------------------|-------------|------------------------------------|-------------------------------------------------------------------------------------------|-------------------------------------------------------|-----------------------------------------------------------------------------------------------------------------------------------------------------------------------------|-----------|
| ORAL<br>Standard,<br>A3921064 (7) | NCT00853385 | 513                                | Patients with active<br>RA with<br>incomplete<br>response to MTX                          | 5 or 10 mg BID<br>with background<br>MTX              | Adalimumab 40 mg<br>SC Q2W; placebo<br>(non-responders<br>advanced to<br>tofacitinib at<br>month 3; all<br>remaining placebo<br>patients advanced to<br>placebo at month 6) | 12 months |
| <b>LTE</b>                        |             |                                    |                                                                                           |                                                       |                                                                                                                                                                             |           |
| ORAL Sequel,<br>A3921024 (8, 9)   | NCT00413699 | 2,308 (as of<br>March 31,<br>2015) | Patients with active<br>RA who<br>participated in<br>phase I, II, or III<br>index studies | 5 or 10 mg BID,<br>concomitant<br>DMARDs<br>permitted | None                                                                                                                                                                        | Ongoing   |

|                 |             |     |                                                                                                                    |                                              |      |           |
|-----------------|-------------|-----|--------------------------------------------------------------------------------------------------------------------|----------------------------------------------|------|-----------|
| A3921041 (8-10) | NCT00661661 | 486 | Japanese patients with active RA who participated in phase II studies A3921039 and A3921040 or phase III ORAL Scan | 5 or 10 mg BID, concomitant DMARDs permitted | None | 72 months |
|-----------------|-------------|-----|--------------------------------------------------------------------------------------------------------------------|----------------------------------------------|------|-----------|

BID = twice daily; csDMARD = conventional synthetic DMARD; DMARD = disease-modifying antirheumatic drug; LTE = long-term

extension; MTX = methotrexate; Q2W = every 2 weeks; RA = rheumatoid arthritis; SC = subcutaneous; TNFi = tumor necrosis factor inhibitor

## References

1. Cohen SB, Tanaka Y, Mariette X, Curtis JR, Lee EB, Nash P, et al. Long-term safety of tofacitinib for the treatment of rheumatoid arthritis up to 8.5 years: integrated analysis of data from the global clinical trials. *Ann Rheum Dis* 2017;76:1253–62.
2. Burmester GR, Blanco R, Charles-Schoeman C, Wollenhaupt J, Zerbini C, Benda B, et al. Tofacitinib (CP-690,550) in combination with methotrexate in patients with active rheumatoid arthritis with an inadequate response to tumour necrosis factor inhibitors: a randomised phase 3 trial. *Lancet* 2013;381:451–60.
3. Fleischmann R, Kremer J, Cush J, Schulze-Koops H, Connell CA, Bradley JD, et al. Placebo-controlled trial of tofacitinib monotherapy in rheumatoid arthritis. *N Engl J Med* 2012;367:495–507.
4. Kremer J, Li Z-G, Hall S, Fleischmann R, Genovese M, Martin-Mola E, et al. Tofacitinib in combination with nonbiologic disease-modifying antirheumatic drugs in patients with active rheumatoid arthritis: a randomized trial. *Ann Intern Med* 2013;159:253–61.
5. Lee EB, Fleischmann R, Hall S, Wilkinson B, Bradley J, Gruben D, et al. Tofacitinib versus methotrexate in rheumatoid arthritis. *N Engl J Med* 2014;370:2377–86.
6. van der Heijde D, Tanaka Y, Fleischmann R, Keystone E, Kremer J, Zerbini C, et al. Tofacitinib (CP-690,550) in patients with rheumatoid arthritis receiving methotrexate: twelve-month data from a twenty-four-month phase III randomized radiographic study. *Arthritis Rheum* 2013;65:559–70.
7. van Vollenhoven RF, Fleischmann R, Cohen S, Lee EB, García Meijide JA, Wagner S, et al. Tofacitinib or adalimumab versus placebo in rheumatoid arthritis. *N Engl J Med* 2012;367:508–19.

8. Wollenhaupt J, Silverfield J, Lee EB, Curtis JR, Wood SP, Soma K, et al. Safety and efficacy of tofacitinib, an oral Janus kinase inhibitor, for the treatment of rheumatoid arthritis in open-label, longterm extension studies. *J Rheumatol* 2014;41:837–52.
9. Wollenhaupt J, Silverfield J, Lee EB, Terry K, Kwok K, Strengholt S, et al. Tofacitinib, an oral Janus kinase inhibitor, in the treatment of rheumatoid arthritis: safety and efficacy in open-label, long-term extension studies over 9 years [abstract]. *Arthritis Rheumatol* 2017;69 Suppl 10. URL: <http://acrabstracts.org/abstract/tofacitinib-an-oral-janus-kinase-inhibitor-in-the-treatment-of-rheumatoid-arthritis-safety-and-efficacy-in-open-label-long-term-extension-studies-over-9-years/>.
10. Yamanaka H, Tanaka Y, Takeuchi T, Sugiyama N, Yuasa H, Toyozumi S, et al. Tofacitinib, an oral Janus kinase inhibitor, as monotherapy or with background methotrexate, in Japanese patients with rheumatoid arthritis: an open-label, long-term extension study. *Arthritis Res Ther* 2016;18:34.
