# Supplementary material for: Risk Factors for Major Adverse Cardiovascular Events in Phase III and Long‐Term Extension Studies of Tofacitinib in Patients With Rheumatoid Arthritis
Source: PubMed Central journal article supplement — Arthritis Rheumatol. 2019 Aug 6;71(9):1450–9. doi: 10.1002/art.40911 (PMC6754249; doi:10.1002/art.40911), 2019-08-06
Supplement: NIHMS1044055-supplement-Supplementary_Table_2.pdf [file NIHMS1044055-supplement-Supplementary_Table_2.pdf]

**Supplementary Table 2.** Covariates included in the analysis at baseline and week 24 in Phase III studies\*

| Parameter, mean (SD)           | Tofacitinib<br>5 mg BID<br>(N = 1593) |              | Tofacitinib<br>10 mg BID<br>(N = 1616) |              | Placebo →<br>Tofacitinib 5 mg BID<br>(N = 343) <sup>†</sup> |              | Placebo →<br>Tofacitinib 10 mg BID<br>(N = 338) <sup>†</sup> |              |
|--------------------------------|---------------------------------------|--------------|----------------------------------------|--------------|-------------------------------------------------------------|--------------|--------------------------------------------------------------|--------------|
|                                | Baseline                              | Week 24      | Baseline                               | Week 24      | Baseline                                                    | Week 24      | Baseline                                                     | Week 24      |
| Weight, kg                     | 71.0 (19.0)                           | 72.3 (18.9)  | 71.2 (18.7)                            | 72.9 (18.9)  | 70.9 (20.1)                                                 | 71.3 (19.5)  | 73.9 (22.3)                                                  | 74.5 (22.7)  |
| BMI, kg/m <sup>2</sup>         | 26.9 (6.4)                            | 27.4 (6.4)   | 27.1 (7.6)                             | 27.8 (7.8)   | 26.8 (6.6)                                                  | 27.0 (6.4)   | 27.7 (7.1)                                                   | 28.0 (7.3)   |
| DAS28-4(ESR)                   | 6.5 (1.0)                             | 4.2 (1.4)    | 6.5 (1.0)                              | 3.9 (1.3)    | 6.4 (1.0)                                                   | 4.5 (1.3)    | 6.4 (1.0)                                                    | 4.4 (1.3)    |
| ESR mm/hr                      | 51.6 (27.0)                           | 33.3 (22.3)  | 51.3 (27.0)                            | 30.1 (20.6)  | 48.4 (24.0)                                                 | 33.0 (22.9)  | 50.3 (27.0)                                                  | 35.6 (24.9)  |
| Tender joint count             | 26.3 (15.0)                           | 10.3 (12.6)  | 26.0 (15.0)                            | 8.3 (11.3)   | 26.3 (15.4)                                                 | 12.1 (13.3)  | 25.8 (15.1)                                                  | 11.3 (13.6)  |
| Swollen joint count            | 15.5 (9.2)                            | 5.1 (7.2)    | 15.5 (9.0)                             | 4.3 (5.9)    | 15.4 (9.4)                                                  | 6.3 (7.3)    | 16.1 (10.0)                                                  | 5.9 (6.8)    |
| Systolic blood pressure, mmHg  | 125.6 (13.4)                          | 124.8 (14.8) | 125.6 (13.5)                           | 125.8 (14.8) | 124.5 (13.4)                                                | 123.9 (15.4) | 126.6 (14.2)                                                 | 125.5 (14.4) |
| Diastolic blood pressure, mmHg | 78.0 (8.0)                            | 77.9 (9.0)   | 78.0 (8.0)                             | 78.2 (8.9)   | 78.0 (7.9)                                                  | 77.1 (9.5)   | 78.2 (8.5)                                                   | 77.9 (10.0)  |
| PGA (0-100 mm) VAS             | 61.1 (17.0)                           | 24.2 (18.1)  | 59.7 (17.1)                            | 21.0 (16.5)  | 60.3 (16.7)                                                 | 26.3 (18.7)  | 59.6 (17.6)                                                  | 26.6 (18.4)  |

N is the number of patients at baseline for each treatment group, the number of patients for each endpoint may be smaller than N; \*Data are from

Phase III studies of tofacitinib, as described in Supplementary table 1; <sup>†</sup>Patients receiving placebo advanced to tofacitinib in Phase III studies as

follows: ORAL Solo and ORAL Step, patients advanced at week 12; ORAL Sync, ORAL Scan and ORAL Standard, non-responders advanced at week 12 and all other patients at week 24

BID – twice daily; BMI = body mass index; DAS28-4 = Disease Activity Score 28-4; ESR = erythrocyte sedimentation rate; N = number of patients included in the analysis for each covariate; PGA = patient’s global assessment; SD, standard deviation; VAS = visual analog scale
